# Supplementary material for: Status of the Italian Freshwater Gastrotricha Biodiversity, with the Creation of an Interactive GIS-Based Web Map
Source: MDPI journal article supplement (doi:10.3390/d16010017), 2023-12-25
Supplement: s1 [file s1]

# Status of the Italian freshwater Gastrotricha biodiversity, with the creation of an interactive GIS-based web map

Francesco Saponi <sup>1,2,3</sup> and M. Antonio Todaro <sup>1,3,\*</sup>

<sup>1</sup> Department of Life Sciences, Università di Modena e Reggio Emilia, via G. Campi, 213/D, 41125 Modena, Italy;

<sup>2</sup> Department of Earth and Marine Sciences, University of Palermo, viale delle Scienze, 90128 Palermo, Italy

<sup>3</sup> National Biodiversity Future Center (NBFC), 90133 Palermo, Italy

\* Correspondence: antonio.todaro@unimore.it

**Table S1.** Unpublished distributional records of Italian freshwater gastrotrichs provided by Prof. M. Balsamo.

| Species                                 | Locality            | Coordinates   |               |
|-----------------------------------------|---------------------|---------------|---------------|
|                                         |                     | Latitude      | Longitude     |
| <i>Aspidiophorus squamulosus</i>        | Bientina swamp      | 43°45'7.58"N  | 10°38'41.92"E |
|                                         | Palagano lakes      | 44°21'8.23"N  | 10°40'44.52"E |
| <i>Chaetonotus acanthocephalus</i>      | Bientina swamp      | 43°45'7.58"N  | 10°38'41.92"E |
|                                         | Palagano lakes      | 44°21'8.23"N  | 10°40'44.52"E |
| <i>Chaetonotus sphagnophilus</i>        | Stablò lake         | 46°17'10.28"N | 10°46'41.29"E |
| <i>Chaetonotus robustus</i>             | Sassomassiccio pond | 44°18'49.41"N | 10°52'40.46"E |
|                                         | Costa lake          | 46°04'30,15"N | 11°14'12,65"E |
| <i>Dasydytes ornatus</i>                | Bientina swamp      | 43°45'7.58"N  | 10°38'41.92"E |
| <i>Haltdydes crassus</i>                | Sibolla lake        | 43°49'34.05"N | 10°42'00.34"E |
| <i>Heterolepidoderma brevitubulatum</i> | Fucecchio marsh     | 43°48'4.51"N  | 10°48'11.54"E |
|                                         | Monterosi lake      | 42°12'21.75"N | 12°18'5.69"E  |
| <i>Heterolepidoderma gracile</i>        | Sibolla lake        | 43°49'34.05"N | 10°42'00.34"E |

**Table S2.** Bray-Curtis similarity matrix based on presence/absence of freshwater gastrotrich species in the Italian regions that have been investigated to date.

| Similarity (0 to 100) |          |                |        |         |           |          |         |               |        |
|-----------------------|----------|----------------|--------|---------|-----------|----------|---------|---------------|--------|
|                       | Campania | Emilia Romagna | Lazio  | Liguria | Lombardia | Sardegna | Toscana | Trentino Alto | Veneto |
| Campania              |          |                |        |         |           |          |         |               |        |
| Emilia Romagna        | 30,435   |                |        |         |           |          |         |               |        |
| Lazio                 | 20,513   | 44,898         |        |         |           |          |         |               |        |
| Liguria               | 0        | 6,8966         | 0      |         |           |          |         |               |        |
| Lombardia             | 33,333   | 40             | 36,364 | 0       |           |          |         |               |        |
| Sardegna              | 42,308   | 41,935         | 36,364 | 0       | 47,826    |          |         |               |        |
| Toscana               | 27,586   | 47,059         | 39,344 | 4,878   | 34,615    | 29,73    |         |               |        |
| Trentino Alto Adige   | 17,778   | 50,909         | 54,167 | 0       | 35,897    | 32,787   | 41,791  |               |        |
| Veneto                | 18,182   | 37,209         | 44,444 | 12,5    | 37,037    | 24,49    | 36,364  | 42,857        |        |
